# Supplementary material
Source: PubMed Central journal article supplement (PMC3377945)
Supplement: NIHMS384766-supplement-1.pdf [file NIHMS384766-supplement-1.pdf]

**Online Resource 1**

Fig. S1. Original examples of changes in EEG and EMG activity following iv saline injections made during sleep state. The data are shown for 30 s before and 120 s after iv saline injection (arrows at 30 s mark the onset of injection).

**Online Resource 2**

Fig. S2. Mean changes in individual EEG waves in the cortex and VTA following iv saline injections in awake state. With one exception (VTA, gamma activity), saline has no significant effects on each EEG frequency in both structures (see text). Vertical hatched lines show the onset of saline injection and filled symbols mark values (VTA gamma) significantly different from the pre-injection baseline.
